# Supplementary material for: Classification of low quality cells from single-cell RNA-seq data
Source: PubMed Central journal article supplement (PMC4758103; doi:10.1186/s13059-016-0888-1), 2016-02-17

Figure S2

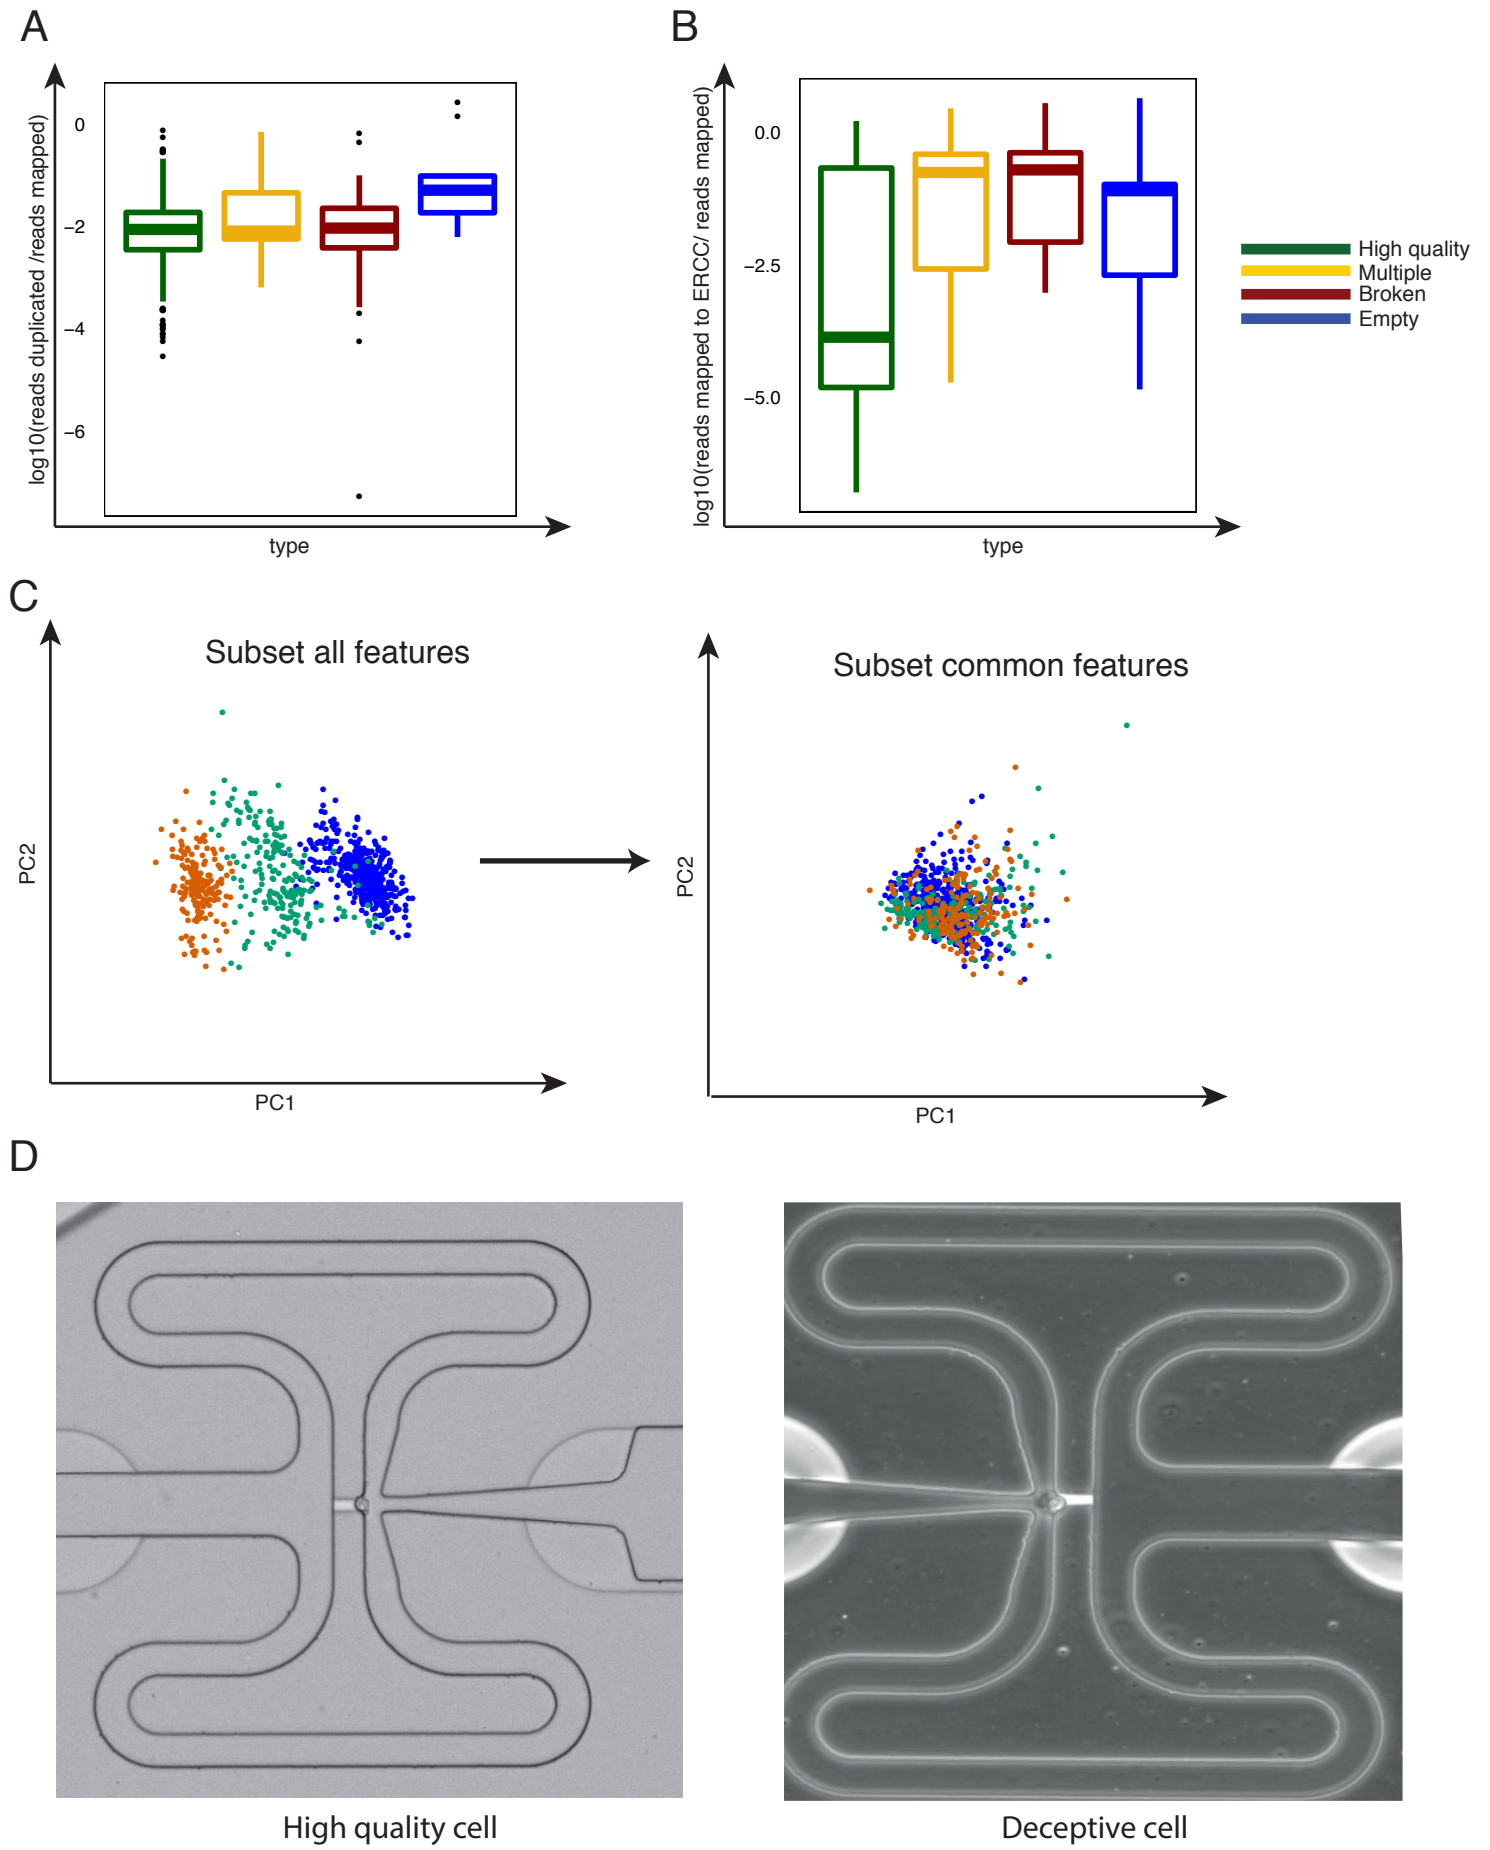

Supplement: 13059_2016_888_MOESM5_ESM.pdf [file 13059_2016_888_MOESM5_ESM.pdf]
