# Supplementary material for: Classification of low quality cells from single-cell RNA-seq data
Source: PubMed Central journal article supplement (PMC4758103; doi:10.1186/s13059-016-0888-1), 2016-02-17
Supplement: 13059_2016_888_MOESM6_ESM.pdf [file 13059_2016_888_MOESM6_ESM.pdf]

Figure S3

A

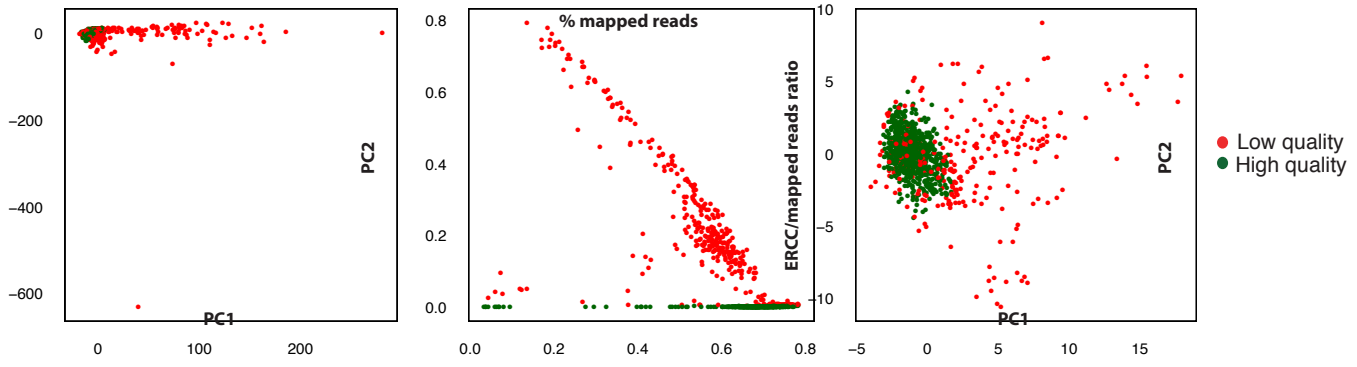

B

Evaluation of model stability using nested crossvalidation

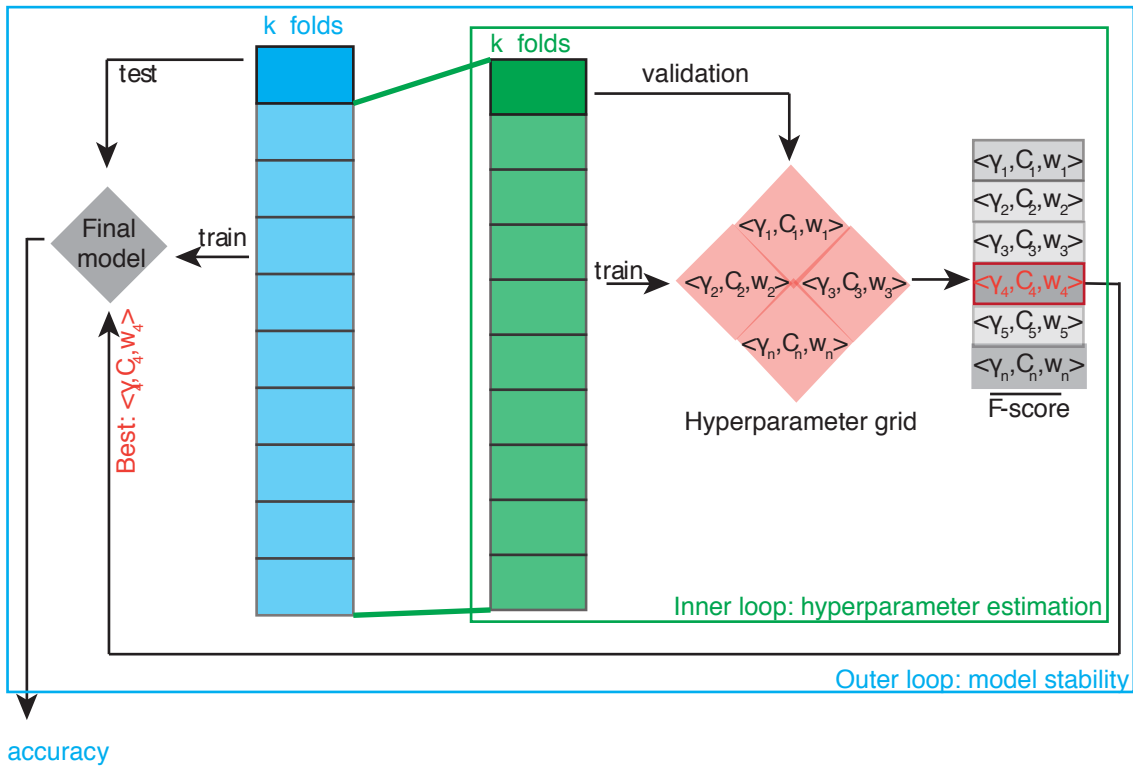

C

TPM Sensitivity (Low quality)

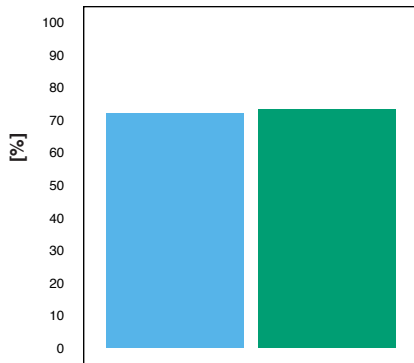

TPM Specificity (High quality)

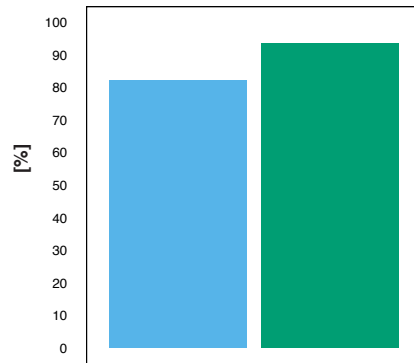

Features (PCA + outlier detection)  
SVM
